# Supplementary material for: Confined growth of multiple gold nanorices in dual-mesoporous silica nanospheres for improved computed tomography imaging and photothermal therapy
Source: PubMed Central journal article supplement — Int J Nanomedicine. 2019 Feb 25;14:1519–32. doi: 10.2147/IJN.S184192 (PMC6396883; doi:10.2147/ijn.s184192), 2019-02-25
Supplement: IJN-14-1519-184192.pdf [file IJN-14-1519-184192.pdf]

## Supplementary Data

### **Confined Growth of Multiple Gold-Nanorices in Dual-Mesoporous Silica Nanospheres for Improved Computed Tomography Imaging and Photothermal Therapy**

Limei Qin,<sup>a</sup> Dechao Niu,\*<sup>a</sup> Yu Jiang,<sup>a</sup> Jianping He,<sup>a</sup> Xiaobo Jia,<sup>a</sup> Wenru Zhao,<sup>a</sup> Pei Li,<sup>b</sup> and  
Yongsheng Li\*<sup>a</sup>

<sup>a</sup> Lab of Low-Dimensional Materials Chemistry, Key Laboratory for Ultrafine  
Materials of Ministry of Education, School of Materials Science and Engineering,  
East China University of Science and Technology, Shanghai 200237, China.

<sup>b</sup> Department of Applied Biology and Chemical Technology, The Hong Kong  
Polytechnic University, Hong Kong, China

E-mail: [dcniu@ecust.edu.cn](mailto:dcniu@ecust.edu.cn), [ysli@ecust.edu.cn](mailto:ysli@ecust.edu.cn)

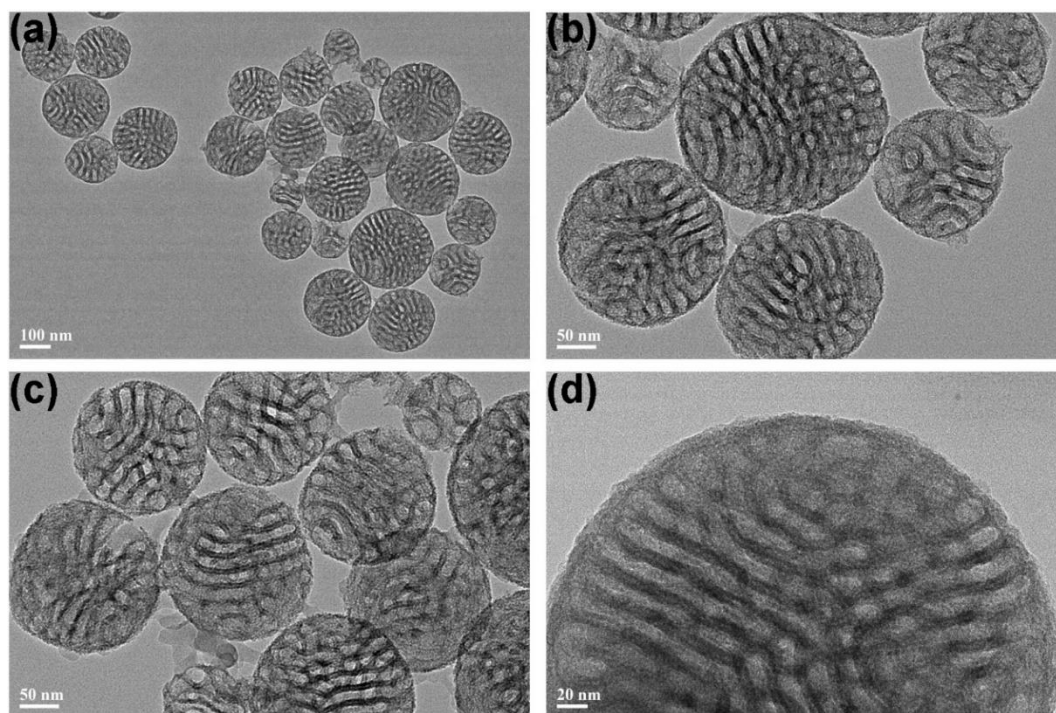

**Fig. S1** TEM images (a-d) of DMSSs at different magnifications.

**Abbreviations:** TEM, transmission electron microscopy; DMSSs, Dual-Mesoporous Silica Nanospheres.

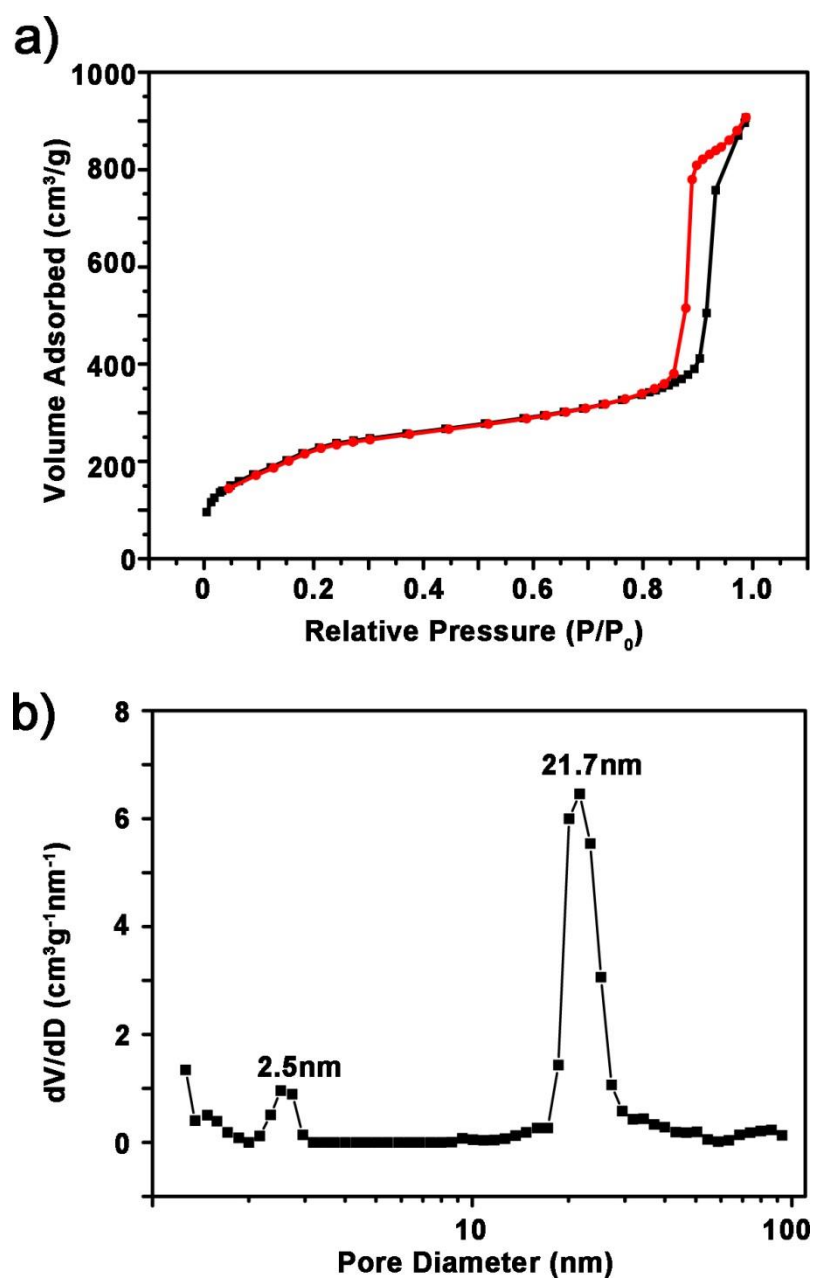

**Fig. S2** (a) N<sub>2</sub> adsorption-desorption isotherm and (b) corresponding DFT pore-size distribution of DMSSs.

**Abbreviations:** DFT, density functional theory; DMSSs, Dual-Mesoporous Silica Nanospheres.

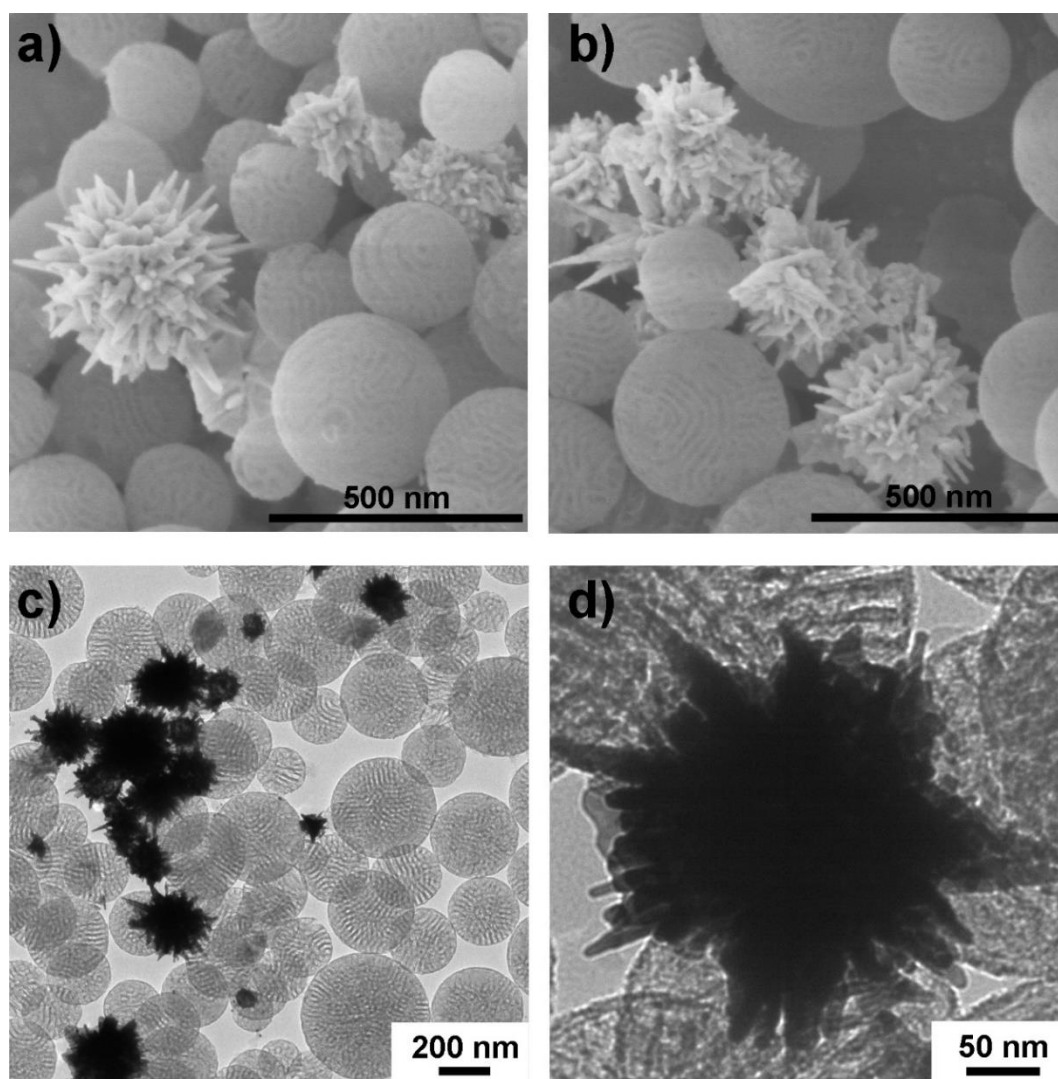

**Fig. S3** SEM images (a, b) and TEM images (c, d) of as-prepared MGNRs@DMSSs without CTAB in Au seeds solution.

**Abbreviations:** SEM, scanning electron microscope; TEM, transmission electron microscopy; as-prepared MGNRs@DMSSs, as-prepared Multiple Gold-Nanorices in Dual-Mesoporous Silica Nanospheres; CTAB, N-Hexadecyltrimethylammonium Bromide; Au seeds, gold seeds.

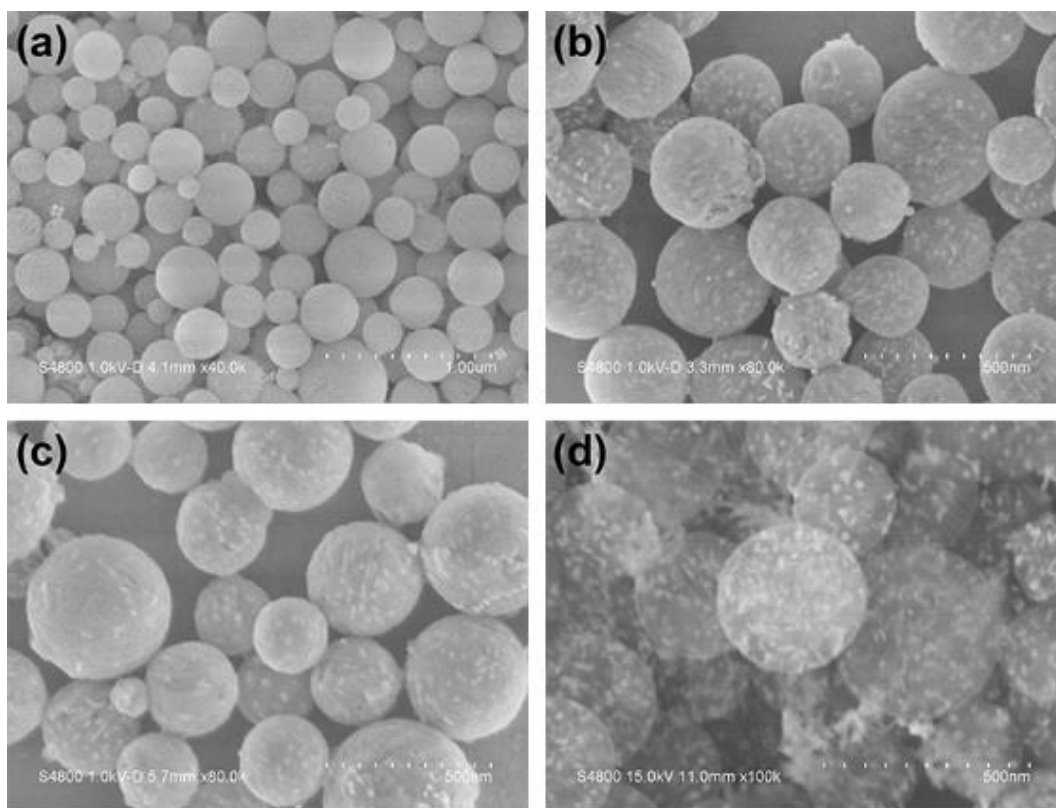

**Fig. S4** SEM images of Au seeds@DMSSs (a) and MGNRs@DMSSs (b-d) at different magnifications and different detector voltages.

**Abbreviations:** SEM, scanning electron microscope; Au seeds@DMSSs, gold seeds encapsulated Dual-Mesoporous Silica Nanospheres; MGNRs@DMSSs, extracted Multiple Gold-Nanorices in Dual-Mesoporous Silica Nanospheres.

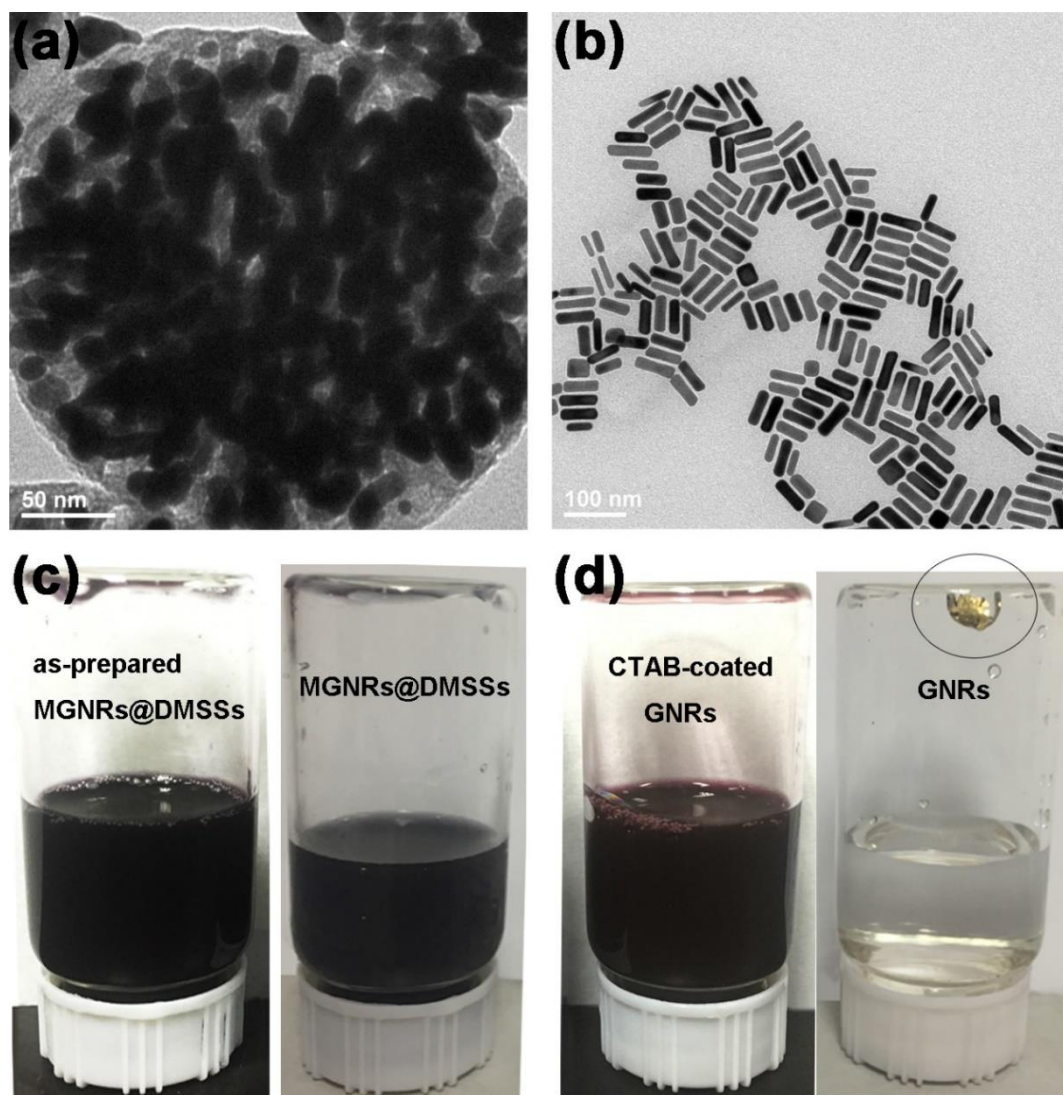

**Fig. S5** TEM images of as-prepared MGNRs@DMSSs (a) and CTAB coated-gold nanorods (b) with the same growth solution and corresponding digital photos, dispersed in water (c) before and (d) after the extraction process.

**Abbreviations:** TEM, transmission electron microscopy; as-prepared MGNRs@DMSSs, as-prepared Multiple Gold-Nanorices in Dual-Mesoporous Silica Nanospheres; CTAB, N-Hexadecyltrimethylammonium Bromide.

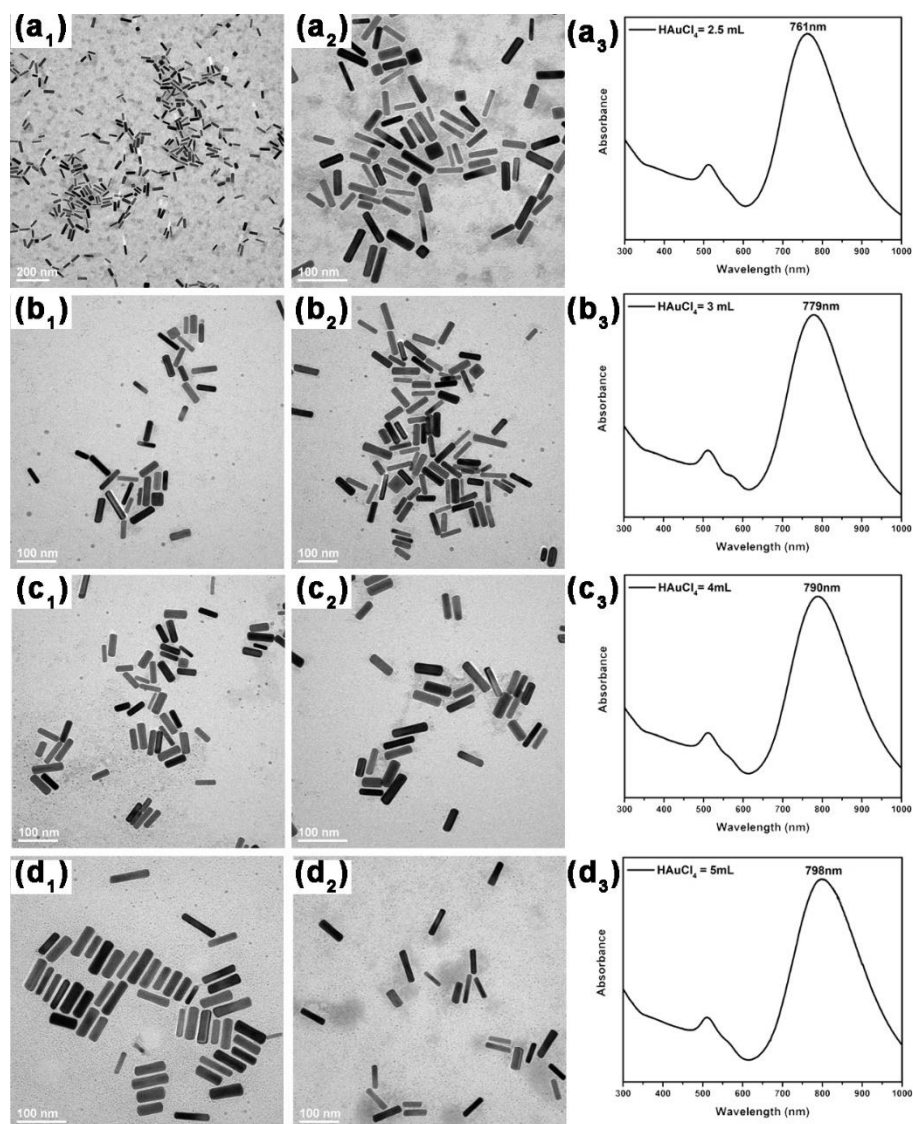

**Figure S6.** TEM images of GNRs and corresponding UV-vis-NIR spectra prepared using different growth solution with varied volumes  $\text{HAuCl}_4$ : (a<sub>1</sub>-a<sub>3</sub>) 2.5 ml, (b<sub>1</sub>-b<sub>3</sub>) 3 ml, (c<sub>1</sub>-c<sub>3</sub>) 4 ml and (d<sub>1</sub>-d<sub>3</sub>) 5 ml, respectively.

**Abbreviations:** TEM, transmission electron microscopy; GNRs: gold nanorods

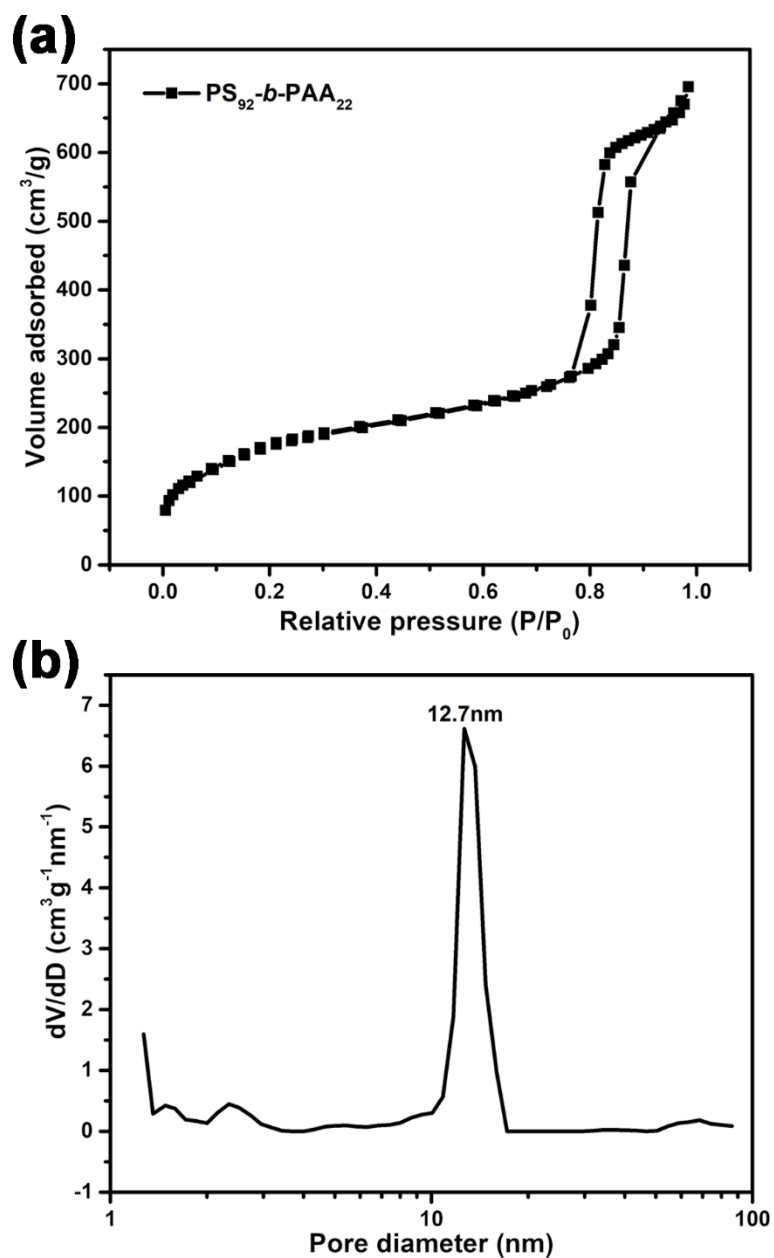

**Figure S7.** (a) N<sub>2</sub> adsorption-desorption isotherm and (b) corresponding DFT pore-size distribution of DMSSs-PS<sub>92</sub> prepared by PS<sub>92</sub>-b-PAA<sub>22</sub> as template.

**Abbreviations:** DFT, density functional theory; DMSSs-PS<sub>92</sub>, Dual-Mesoporous Silica Nanospheres prepared by using PS<sub>92</sub>-b-PAA<sub>22</sub> as template.

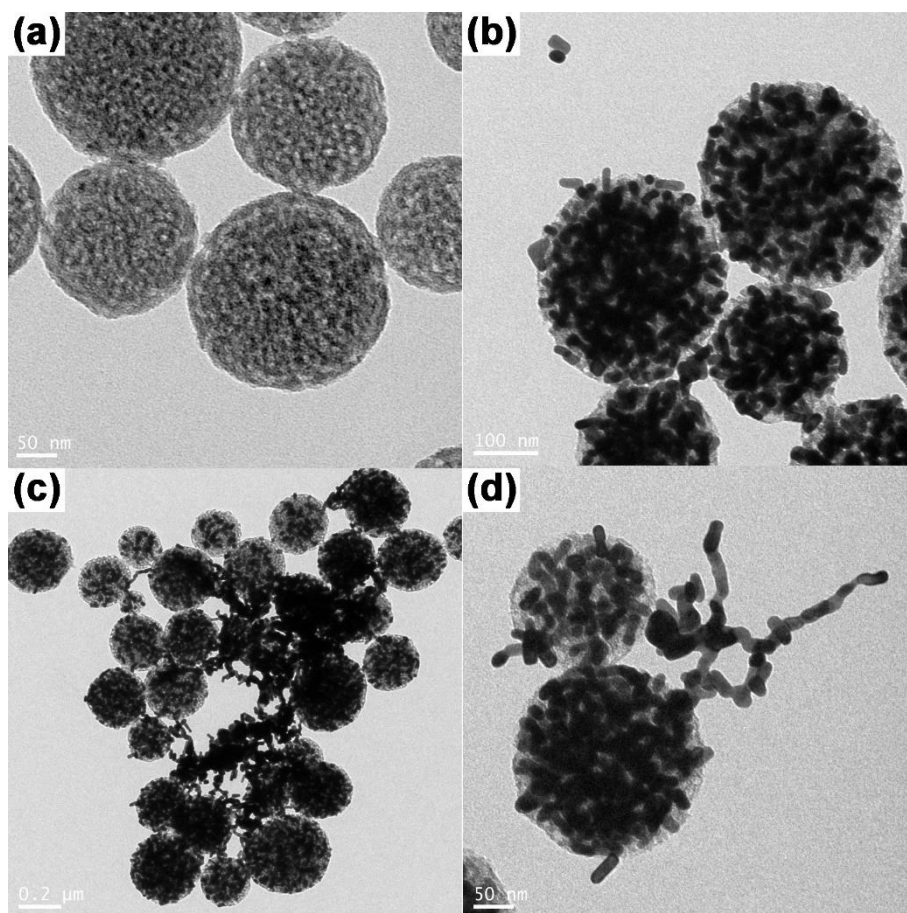

**Figure S8.** TEM images of (a) DMSSs-PS<sub>92</sub> and (b, c, d) PEGylated MGNRs@DMSSs-PS<sub>92</sub> at different magnifications.

**Abbreviations:** TEM, transmission electron microscopy; DMSSs-PS<sub>92</sub>, Dual-Mesoporous Silica Nanospheres prepared by using PS<sub>92</sub>-*b*-PAA<sub>22</sub> as template. PEGylated MGNRs@DMSSs-PS<sub>92</sub>: PEG modified Dual-Mesoporous Silica Nanospheres prepared by using PS<sub>92</sub>-*b*-PAA<sub>22</sub> as template.

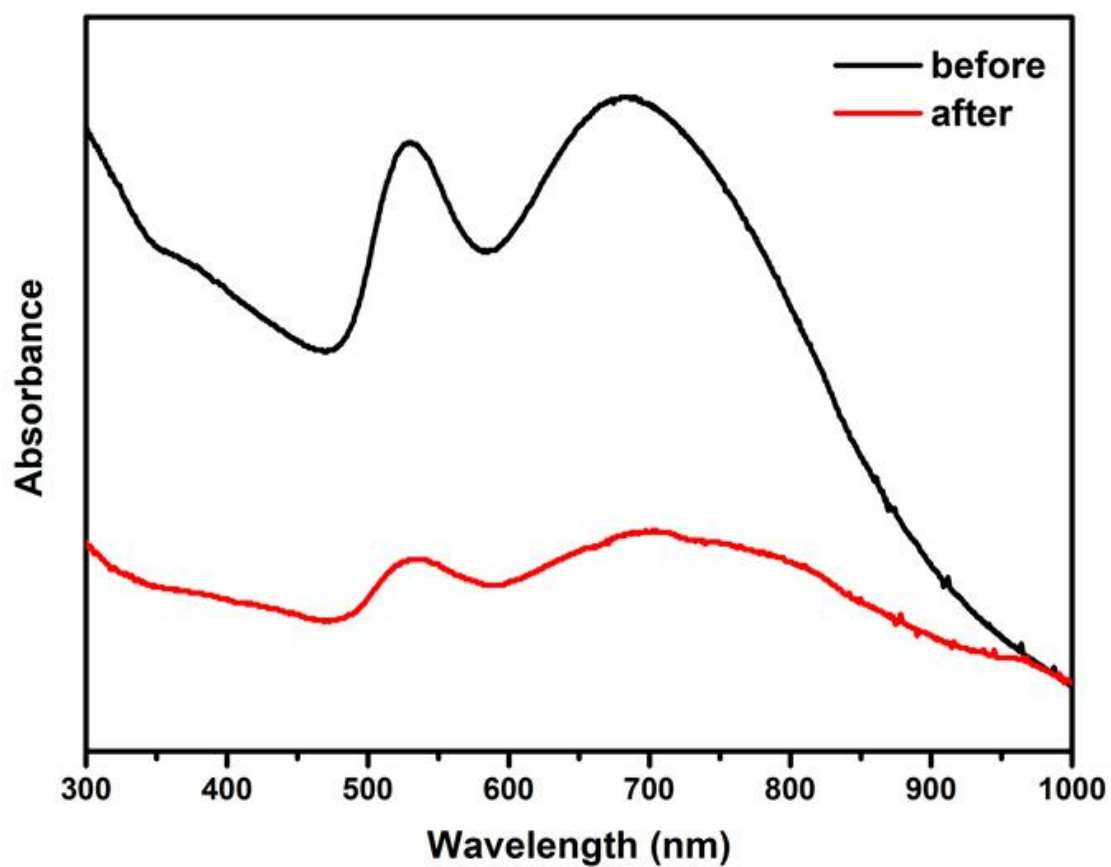

**Fig. S9** UV-vis-NIR spectra of PEGylated MGNRs@DMSSs before and after 5 cycles of 808 nm laser irradiation.

**Abbreviations:** PEGylated MGNRs@DMSSs, PEG modified Multiple Gold-Nanorices in Dual-Mesoporous Silica Nanospheres.

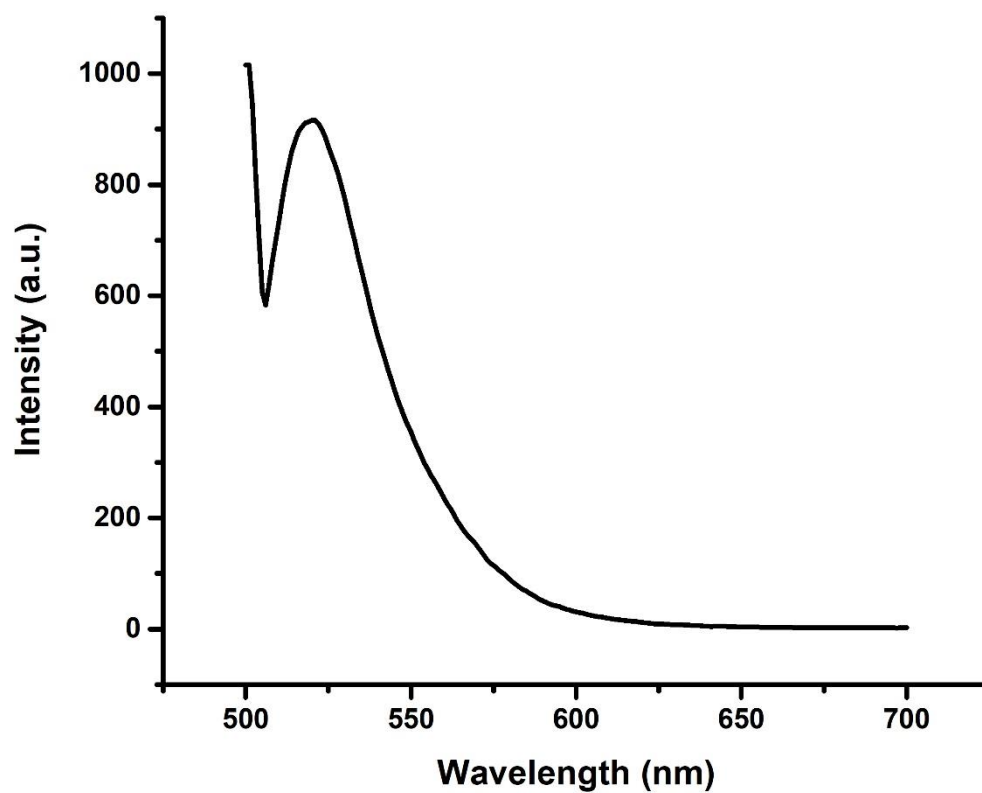

**Fig. S10** Photoluminescence spectrum of FITC-labelled PEGylated MGNRs@DMSSs under the excitation wavelength of 488 nm.

**Abbreviations:** FITC, Fluorescein isothiocyanate; PEGylated MGNRs@DMSSs, PEG modified Multiple Gold-Nanorices in Dual-Mesoporous Silica Nanospheres.

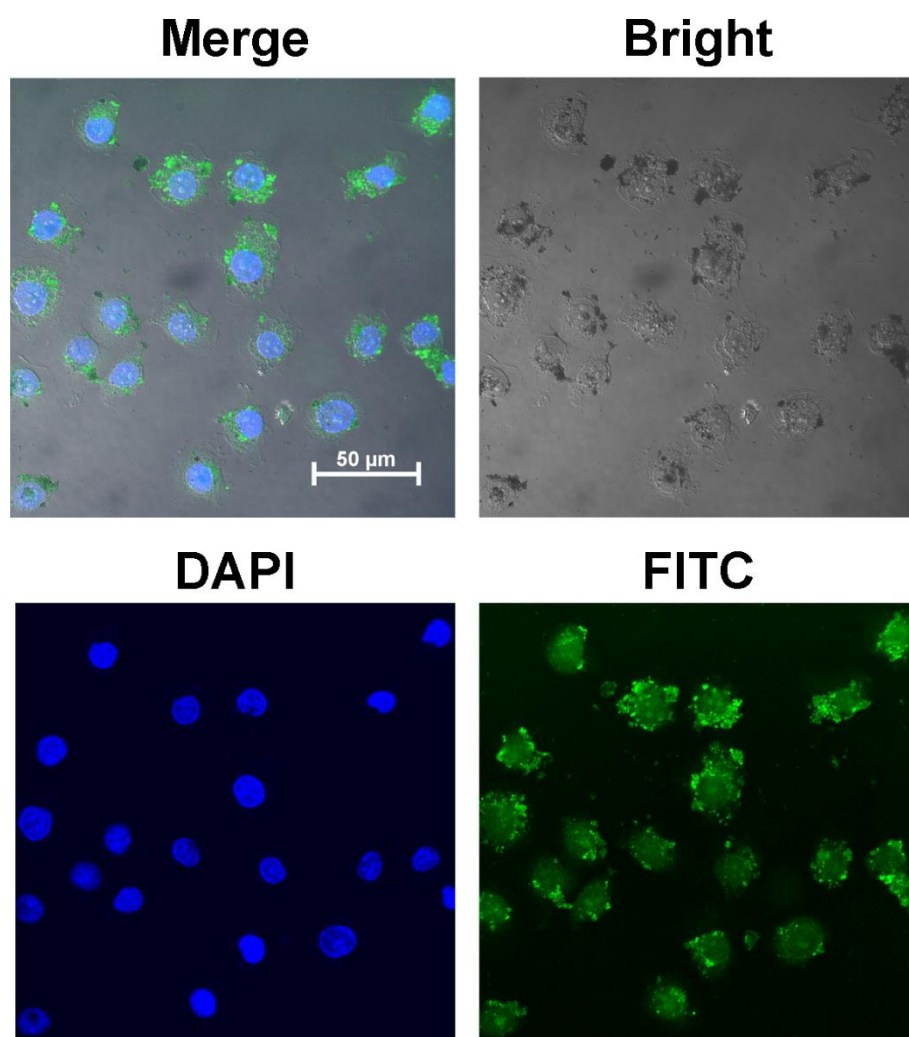

**Fig. S11** Confocal laser scanning microscope (CLSM) images of SMMC-7721 cells after incubation with FITC-labelled PEGylated MGNRs@DMSSs for 4 h.

**Abbreviations:** FITC, Fluorescein isothiocyanate; PEGylated MGNRs@DMSSs, PEG modified Multiple Gold-Nanorices in Dual-Mesoporous Silica Nanospheres.

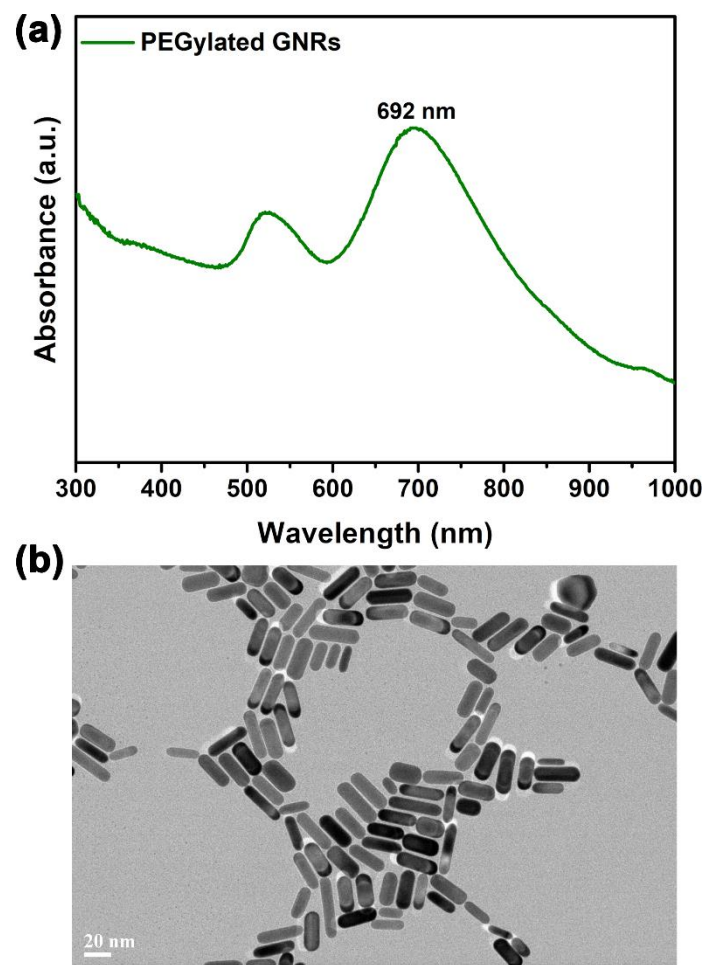

**Fig. S12** (a) UV-vis-spectra and (b) TEM image of PEGylated GNRs with UV-vis absorption at 692 nm.

**Abbreviations:** PEGylated GNRs, PEG modified gold nanorods..

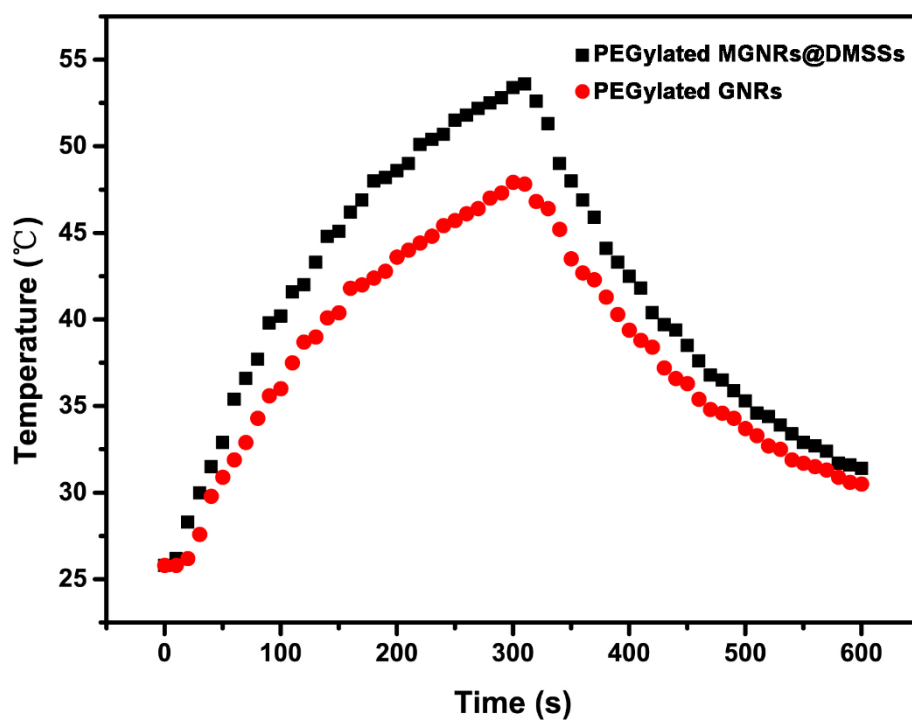

**Fig.S13** Temperature curves of the aqueous dispersion of PEGylated GNRs and PEGylated MGNRs@DMSSs ( $[\text{Au}]=70 \mu\text{g mL}^{-1}$ , 1 mL) with the NIR laser (808 nm,  $1.5 \text{ W cm}^{-2}$ ), in which the irradiation lasted for 5 min, and then the laser was turned off.

**Abbreviations:** PEGylated GNRs, PEG modified gold nanorods; PEGylated MGNRs@DMSSs, PEG modified Multiple Gold-Nanorices in Dual-Mesoporous Silica Nanospheres.

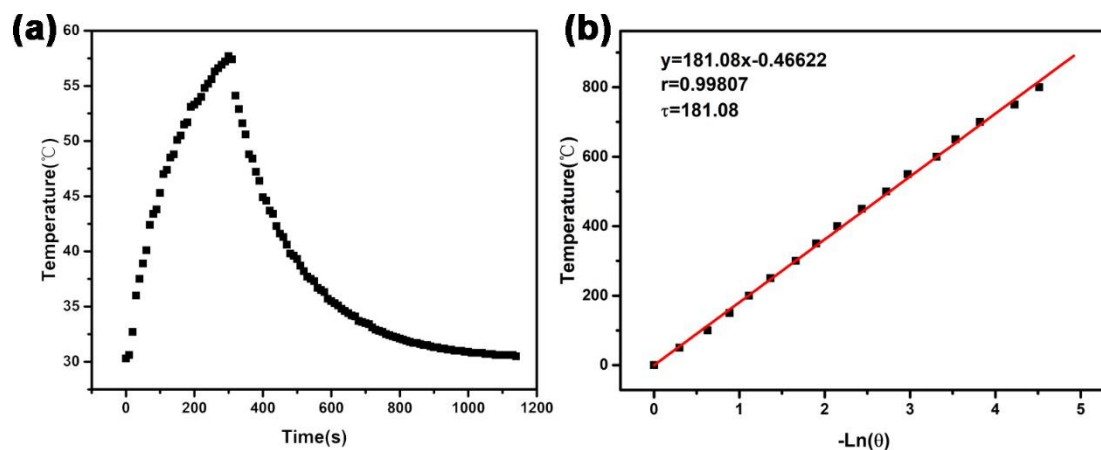

**Fig. S14** Calculation of the photothermal-conversion efficiency of PEGylated MGNRs@DMSSs at 808 nm. (a) photothermal effect of an aqueous dispersion of PEGylated MGNRs@DMSSs under irradiation with a 808 nm NIR for certain periods, then the laser turned off; (b) Time constant ( $\tau$ ) from the system determined by applying the linear time data from the cooling period.

**Abbreviations:** PEGylated MGNRs@DMSSs, PEG modified Multiple Gold-Nanorices in Dual-Mesoporous Silica Nanospheres.

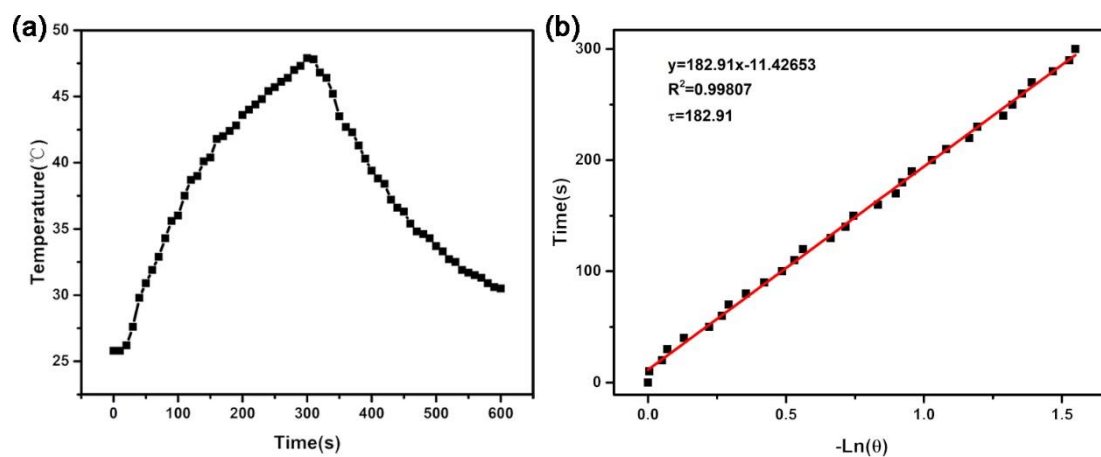

**Fig. S15** Calculation of the photothermal-conversion efficiency of PEGylated GNRs at 808 nm. (a) photothermal effect of an aqueous dispersion of PEGylated GNRs under irradiation with a 808 nm NIR for certain periods, then the laser turned off; (b) Time constant ( $\tau$ ) from the system determined by applying the linear time data from the cooling period.

**Abbreviations:** PEGylated GNRs, PEG modified gold nanorod.

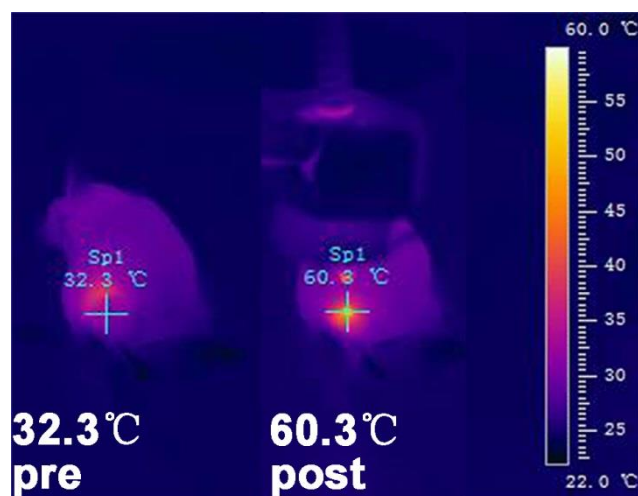

**Fig. S16** Thermal images of tumor-bearing mice injected with PEGylated MGNRs@DMSSs ([Au] = 5.3 mg/mL, 50  $\mu$ L), followed by irradiation with 808 nm laser (1.5 W cm<sup>-2</sup>) pre and post injection.

**Abbreviations:** PEGylated MGNRs@DMSSs, PEG modified Multiple Gold-Nanorices in Dual-Mesoporous Silica Nanospheres.
